# Supplementary material for: Inhibition of lactate transport by MCT-1 blockade improves chimeric antigen receptor T-cell therapy against B-cell malignancies
Source: HighWire-hosted journal article supplement (doi:10.1136/jitc-2022-006287), 2023-06-01
Supplement: jitc-2022-006287supp001_data_supplement.pdf [file jitc-2022-006287supp001_data_supplement.pdf]

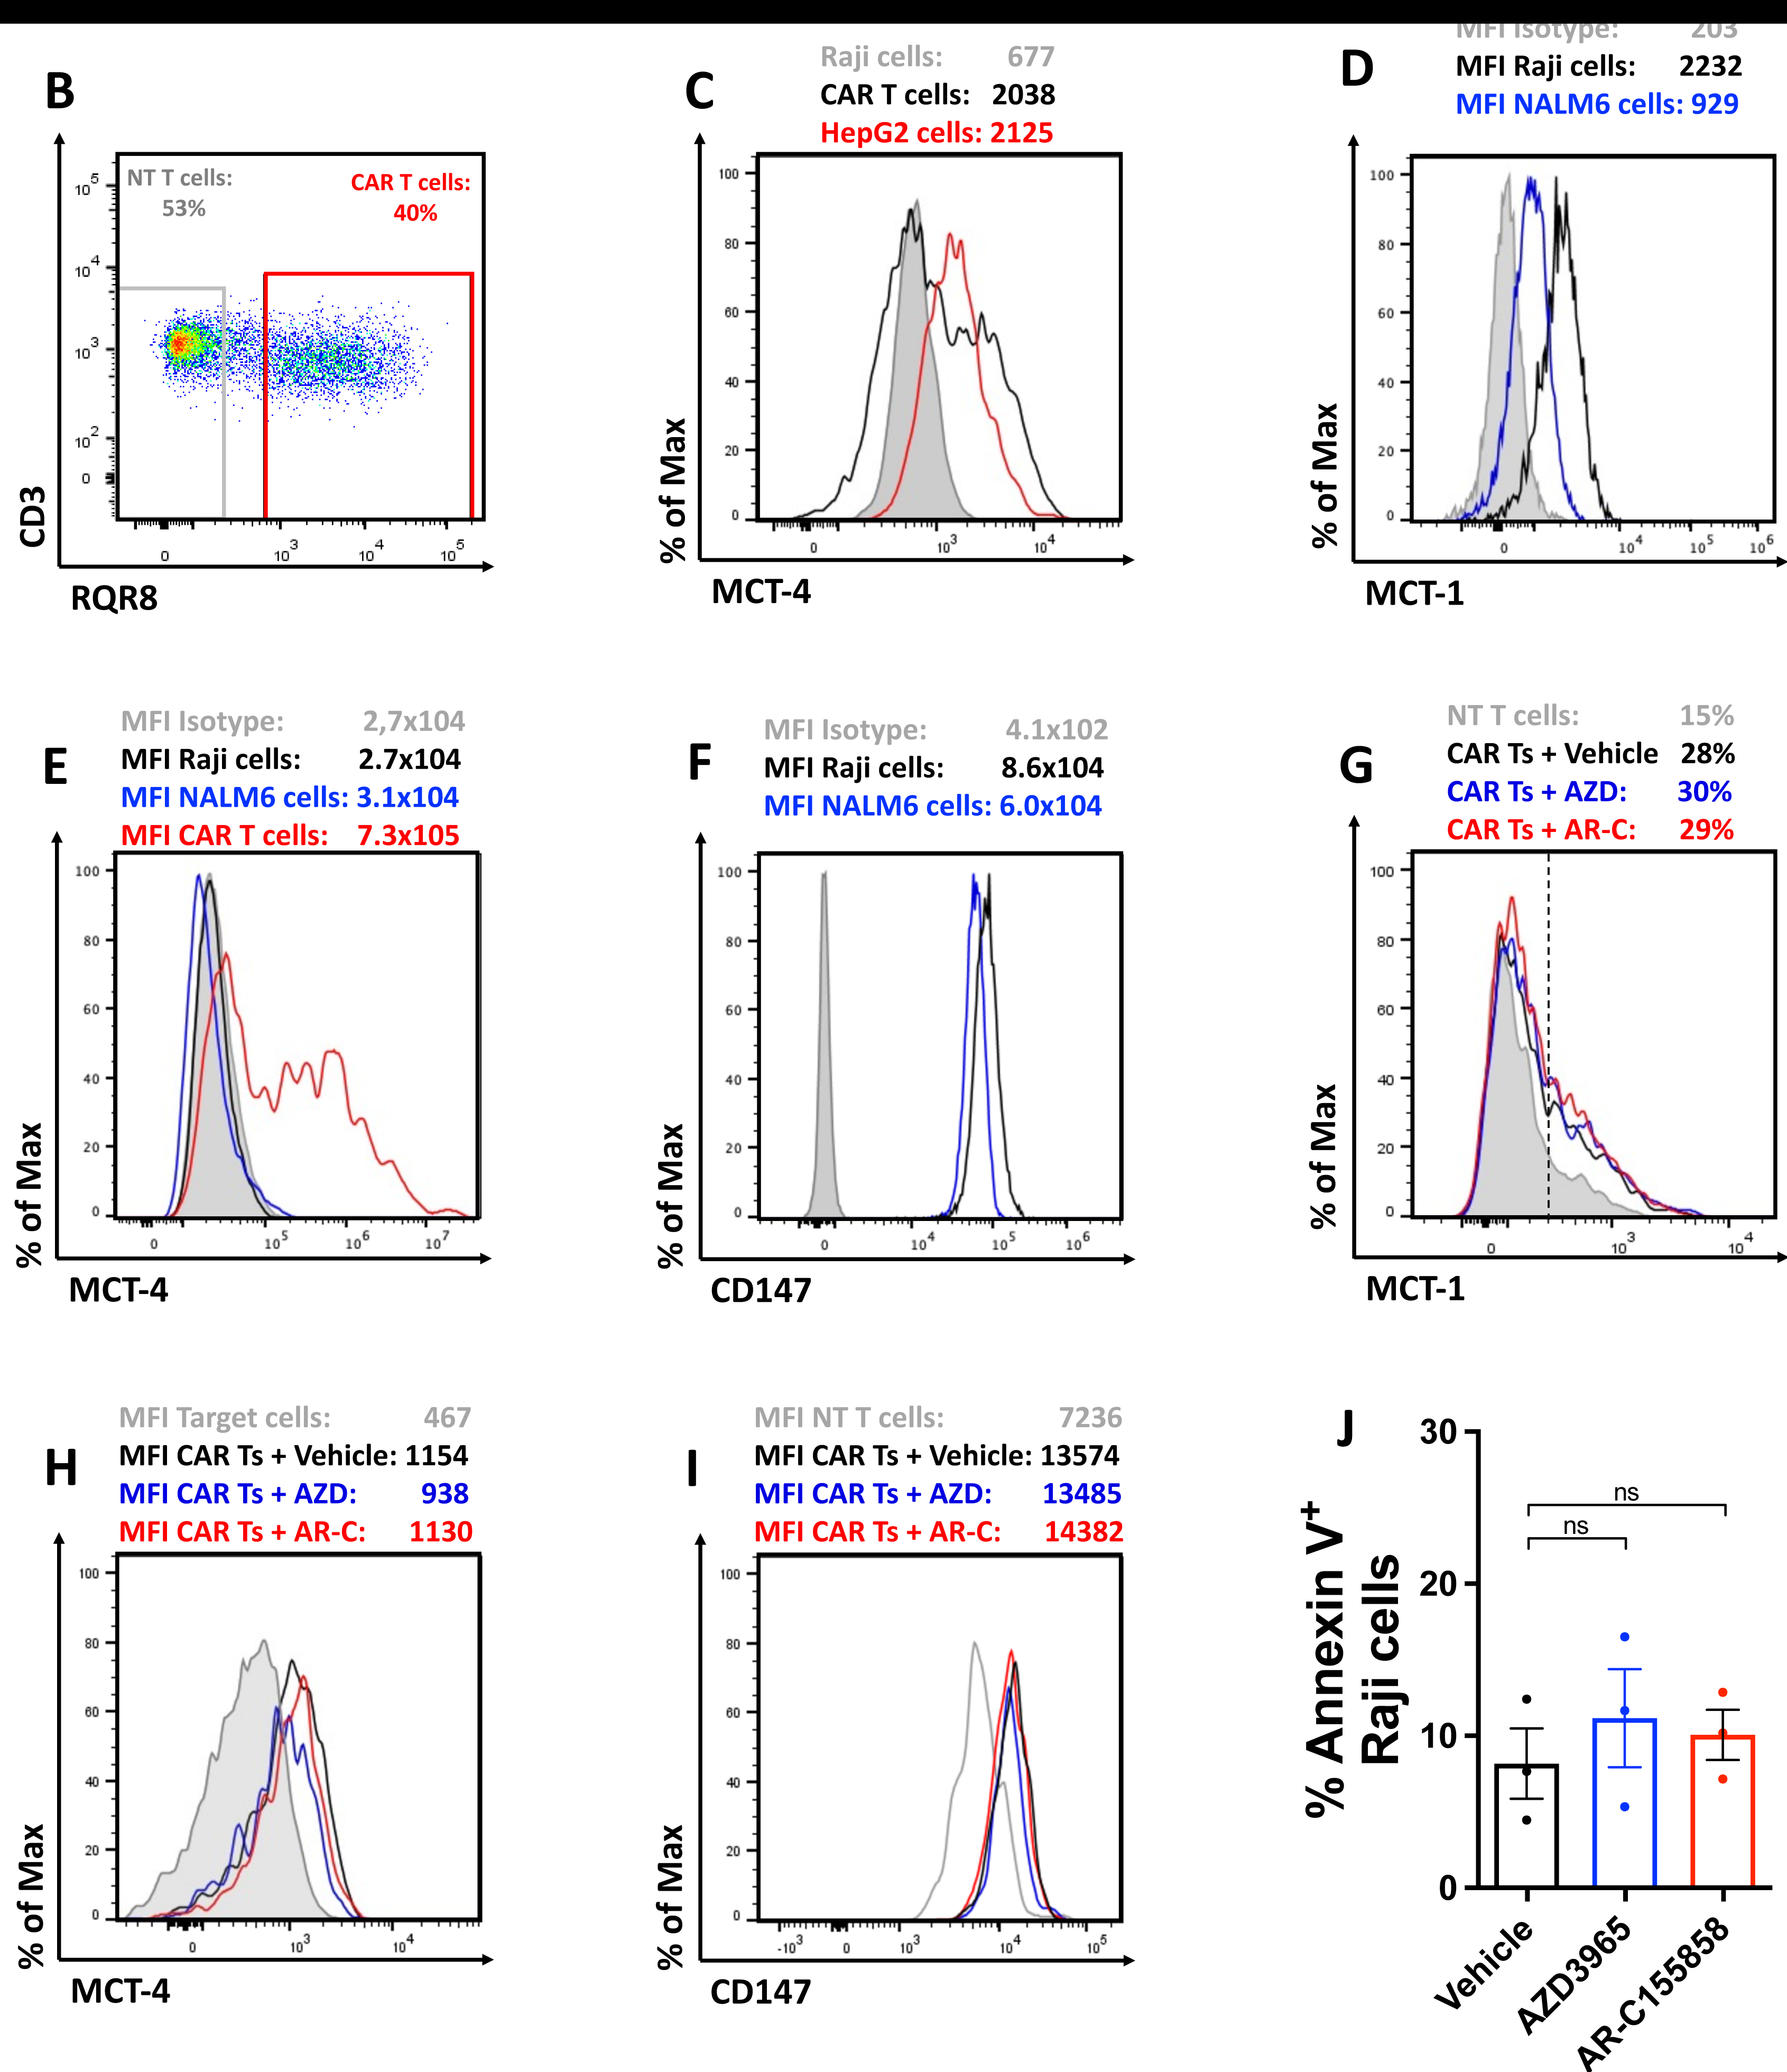

**Supplementary figure 1: MCT expression on CAR T cells after MCT-1 pharmacological blockade.** (A) Schematic of RQR8 and  $\alpha$ CD19-FMC63-41BB CAR construct. (B) Representative plot of RQR8 expression on transduced T cells. (C) MCT-4 expression on Raji, CAR T and HepG2 cells. Expression of (D) MCT-1, (E) MCT-4 and (F) CD147 on Raji and NALM6 cells. Expression of (G) MCT-1, (H) MCT-4 and (I) CD147 on  $\alpha$ CD19-CAR T cells cultured with target tumour cells and MCT-1 inhibitors for 24 hours, n=5-6 healthy donors per group. (J) Annexin V staining on Raji cells after 48 hours of culture with MCT-1 inhibitors, n=3. Data representative of two independent experiments.
