# Supplementary material for: Inhibition of lactate transport by MCT-1 blockade improves chimeric antigen receptor T-cell therapy against B-cell malignancies
Source: HighWire-hosted journal article supplement (doi:10.1136/jitc-2022-006287), 2023-06-01
Supplement: jitc-2022-006287supp003_data_supplement.pdf [file jitc-2022-006287supp003_data_supplement.pdf]

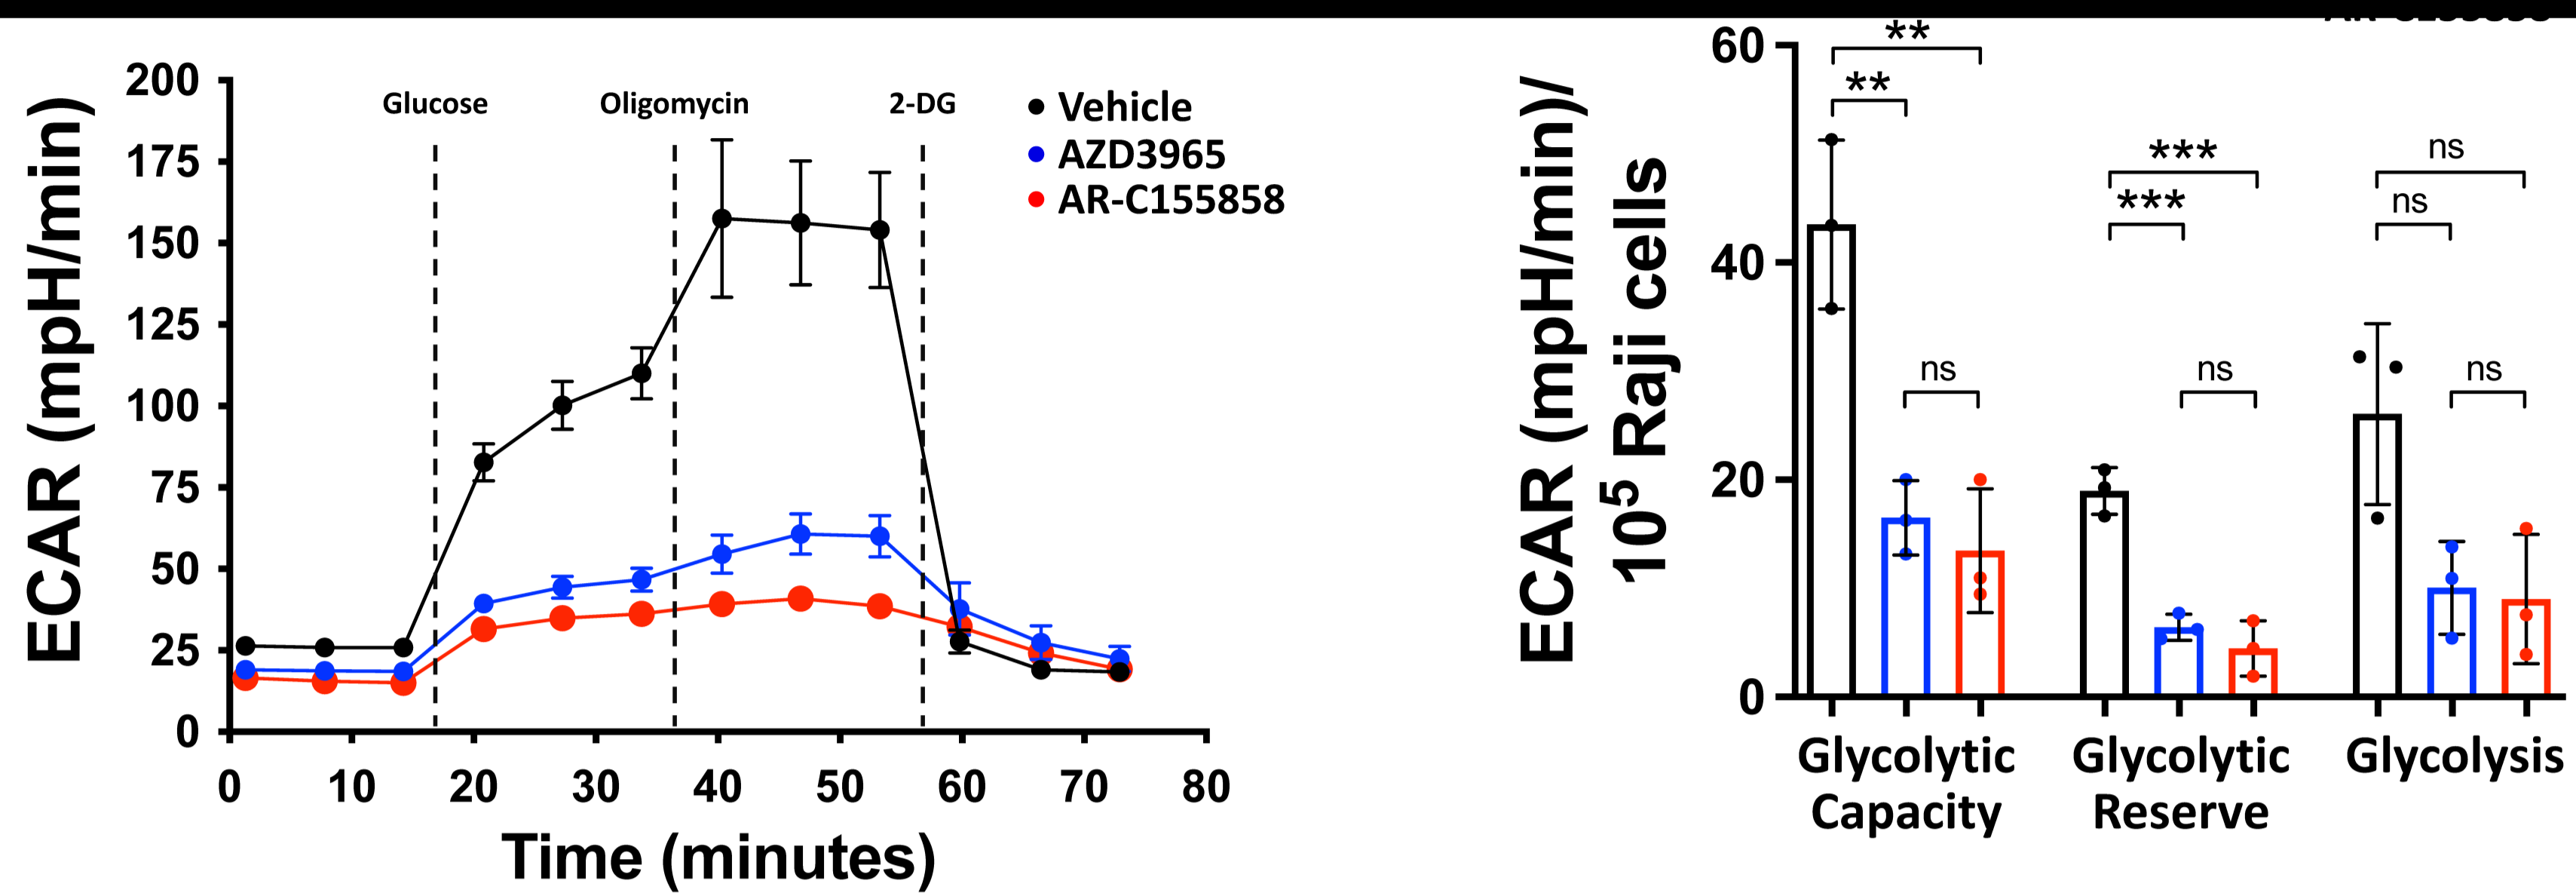

**Supplementary figure 3: ECAR measurement on Raji cells after MCT-1 inhibition. (A)** Representative plot of extracellular acidification rate (ECAR) on Raji cells cultured for 24 hours with MCT-1 inhibitors, n=5 replicates. Bars are the mean  $\pm$  SEM. **(B)** Glycolytic capacity, glycolytic reserve and glycolysis. Data from three independent experiments. Bars are the mean  $\pm$  SD. \*\*p < 0.01, \*\*\*p < 0.001, ns = non-significant by Friedman One-Way ANOVA.
