# Supplementary material for: Inhibition of lactate transport by MCT-1 blockade improves chimeric antigen receptor T-cell therapy against B-cell malignancies
Source: HighWire-hosted journal article supplement (doi:10.1136/jitc-2022-006287), 2023-06-01
Supplement: jitc-2022-006287supp004_data_supplement.pdf [file jitc-2022-006287supp004_data_supplement.pdf]

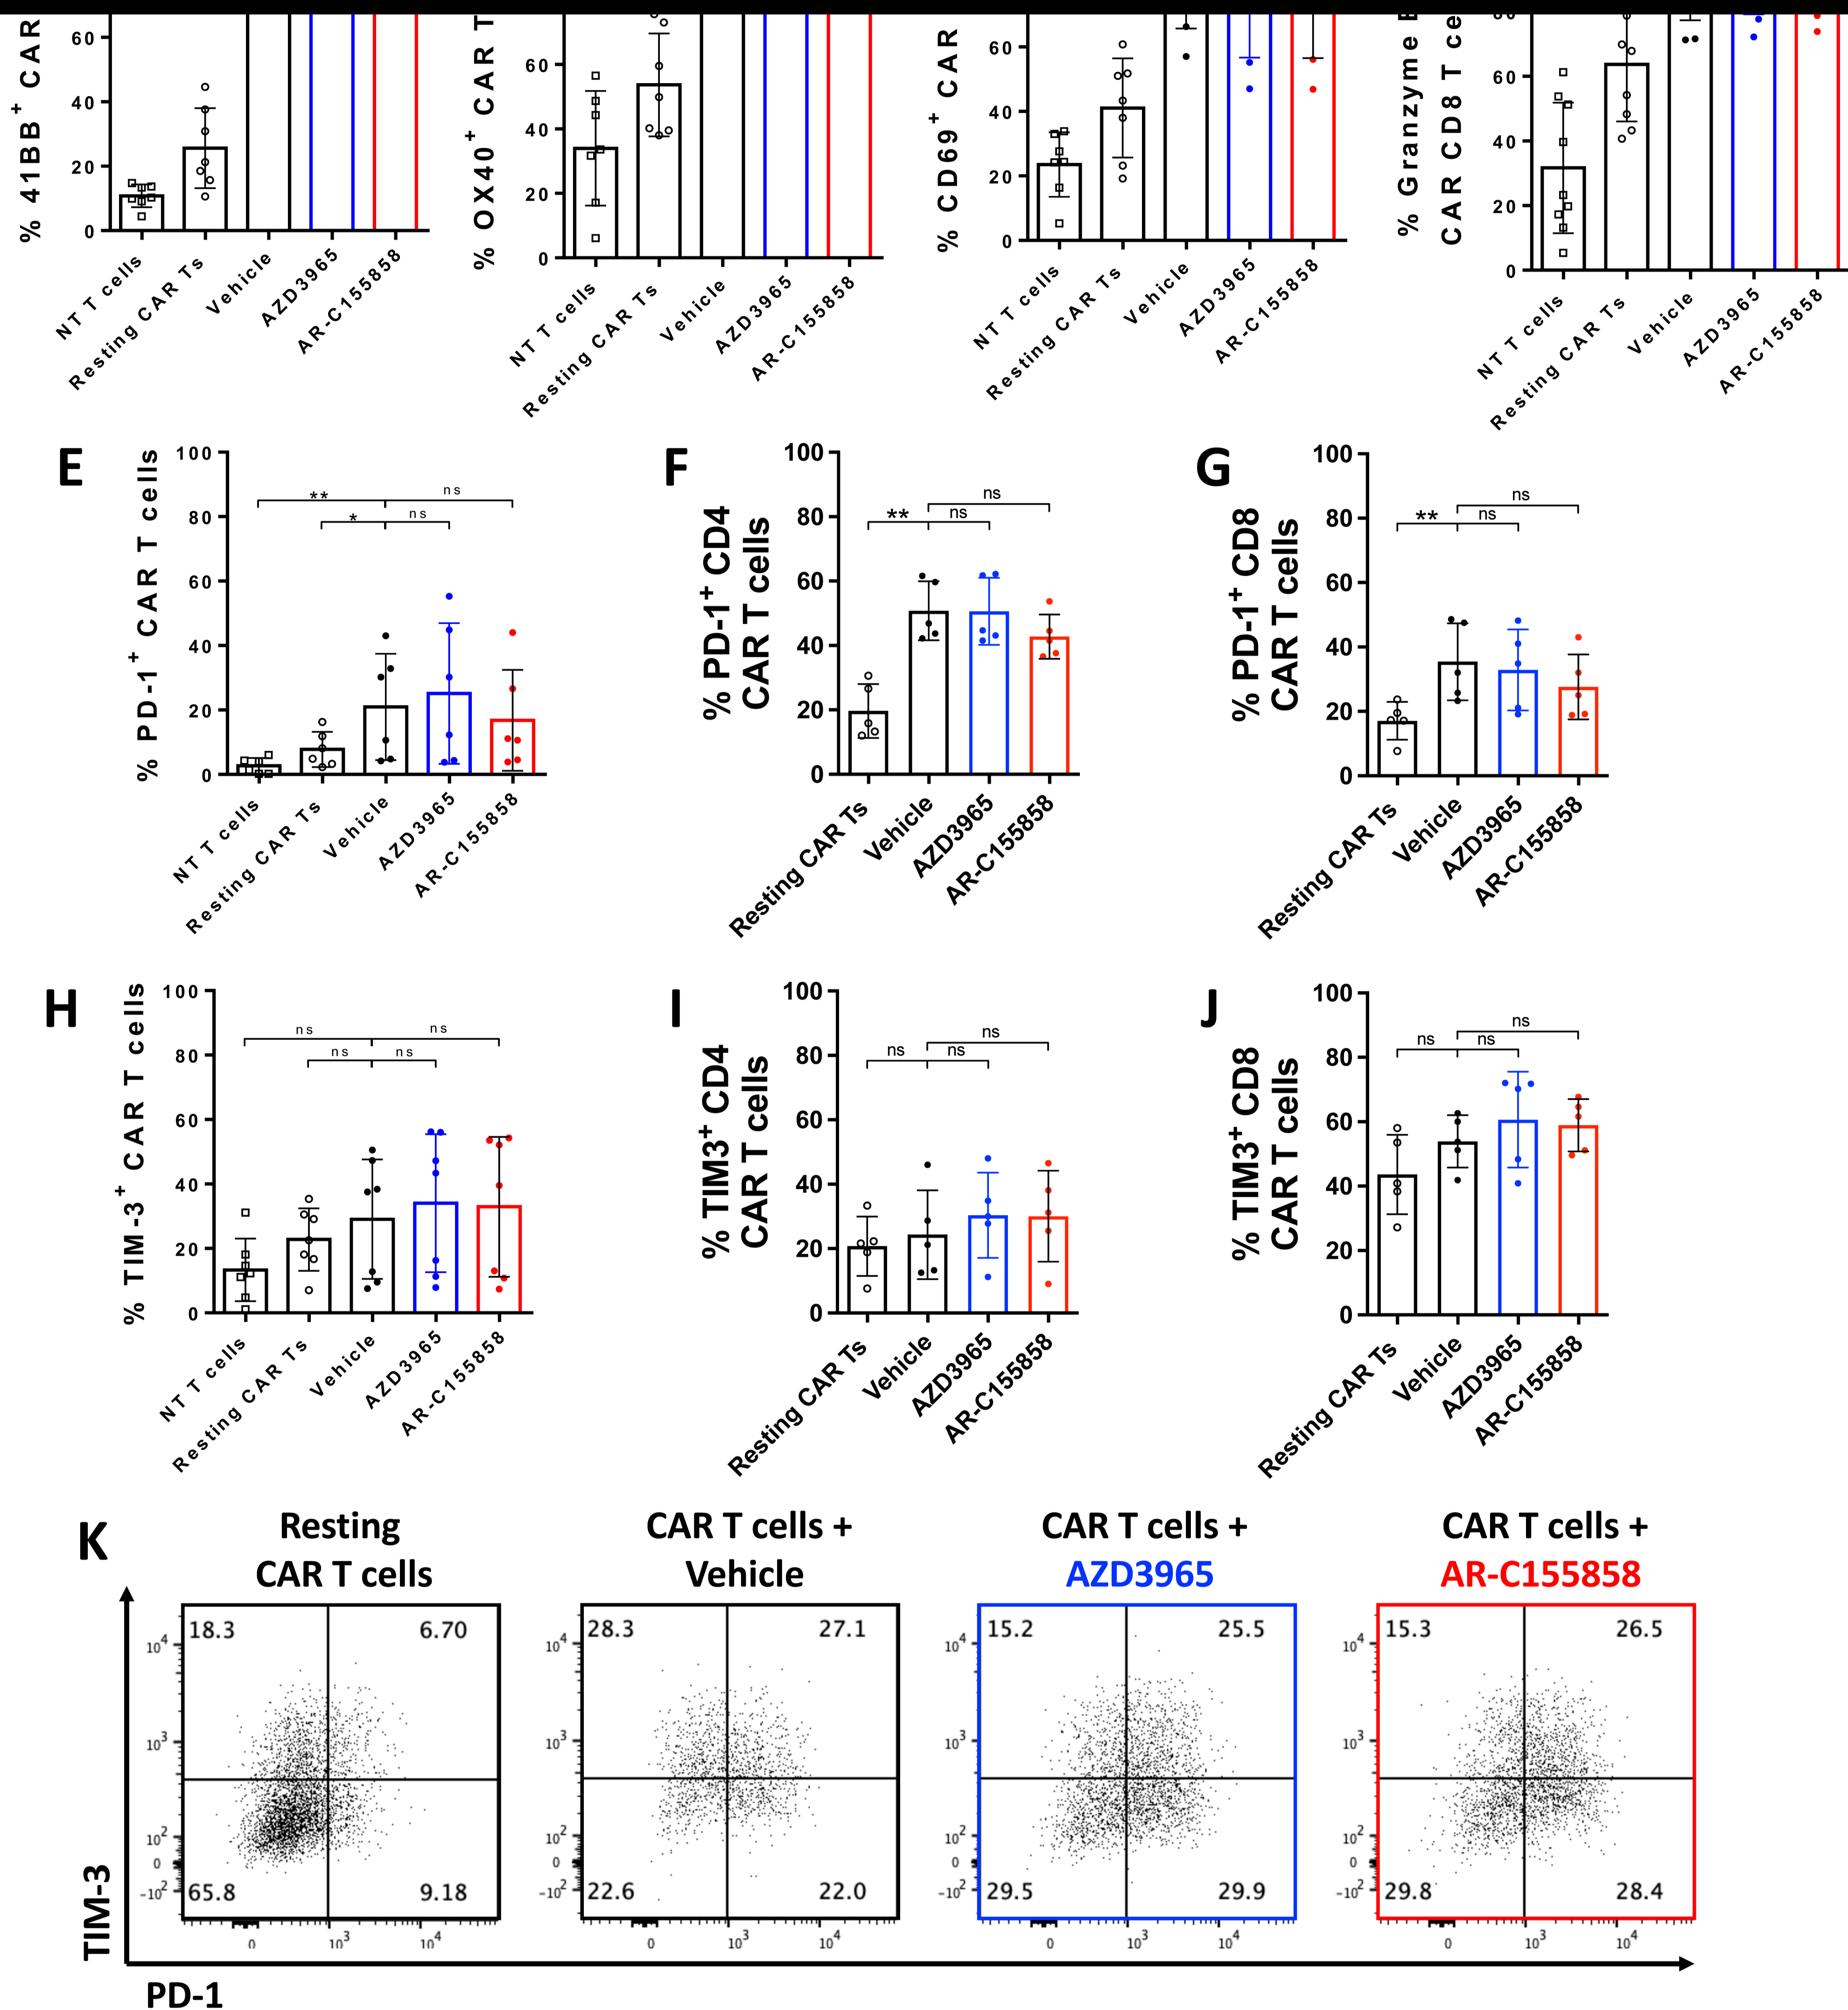

**Supplementary figure 4: Expression of activation markers on CAR T cells after MCT-1 inhibition.** Non-transduced or  $\alpha$ CD19-CAR T cells were cultured with target tumour cells and MCT-1 inhibitors for 24 hours. Expression of (A) 4-1BB, (B) OX40, (C) CD69, (D) Granzyme B, (E) PD-1, (F) TIM-3 and (G) PD-1/TIM-3 on re-stimulated CAR T cells with Raji cells or Raji-CD19<sup>KO</sup> (Resting CAR T cells) for 24 hours. Pooled data of three independent experiments, n = 7 healthy donors per group. Bars are the mean  $\pm$  SD. \*p < 0.05, \*\*p < 0.01, \*\*\*p < 0.001, ns = non-significant by Friedman One-Way ANOVA.
