# Supplementary material for: Inhibition of lactate transport by MCT-1 blockade improves chimeric antigen receptor T-cell therapy against B-cell malignancies
Source: HighWire-hosted journal article supplement (doi:10.1136/jitc-2022-006287), 2023-06-01
Supplement: jitc-2022-006287supp009_data_supplement.pdf [file jitc-2022-006287supp009_data_supplement.pdf]

Supplementary table 1: List of antibodies

| REAGENT or RESOURCE                               | SOURCE        | IDENTIFIER |
|---------------------------------------------------|---------------|------------|
| <b>Antibodies</b>                                 |               |            |
| Anti-human CD19 FITC (SJ25C1)                     | Biologend     | 363008     |
| Anti-human CD366 FITC (F38-2E2)                   | Biologend     | 345022     |
| Anti-human CD3 FITC (HIT1a)                       | Biologend     | 300306     |
| Anti-human CD34 Alexa Fluor 488 (MAb11)           | R&D Systems   | FAB7227G   |
| Anti-human CD147 Alexa Fluor 488 (MEM-M6/1)       | Abcam         | ab666      |
| Anti-human CD197 PerCP/Cyanine5.5 (G043H7)        | Biologend     | 353219     |
| Anti-human CD279 PerCP/Cyanine5.5 (EH12.2H7)      | Biologend     | 329914     |
| Anti-human IFN- $\gamma$ PE (4S.B3)               | Biologend     | 502509     |
| Anti-human CD137 PE (4B4.1)                       | Biologend     | 309804     |
| Anti-human CD3 PE (HIT1a)                         | Biologend     | 300308     |
| Anti-human CD34 Alexa Fluor 488 (MAb11)           | R&D Systems   | FAB7227P   |
| Anti-human CD137 PE/Dazzle 594 (4B4.1)            | Biologend     | 309826     |
| Anti-human CD8 PE/Dazzle 594 (RPA-T8)             | Biologend     | 301058     |
| Anti-human CD278 PE/Cy7 (C398.4A)                 | Biologend     | 313520     |
| Anti-human CD3 APC (HIT1a)                        | Biologend     | 300312     |
| Anti-human CD45RA APC (HI100)                     | Biologend     | 304112     |
| Anti-human CD19 APC (SJ25C1)                      | Biologend     | 363006     |
| Anti-human CD34 APC (MAb11)                       | R&D Systems   | FAB7227A   |
| Anti-human MCT1/SLC16A1 APC (MAb11)               | R&D Systems   | FAB8275A   |
| Anti-human Granzyme B Alexa Fluor 647 (GB11)      | Biologend     | 515406     |
| Anti-human Granzyme B Alexa Fluor 700 (QA16A02)   | Biologend     | 372222     |
| Anti-human CD3 Pacific Blue (HIT1a)               | Biologend     | 300330     |
| Anti-human CD45RO Brilliant Violet 421 (UCHL1)    | Biologend     | 304224     |
| Anti-human CD366 Brilliant Violet 421 (F38-2E2)   | Biologend     | 345008     |
| Anti-human FOXP3 Brilliant Violet 421 (206D)      | Biologend     | 320124     |
| Anti-human CD25 Brilliant Violet 510 (M-A251)     | Biologend     | 356120     |
| Anti-human CD2 Brilliant Violet 510 (RPA-2.10)    | Biologend     | 300218     |
| Anti-human CD69 Brilliant Violet 605 (FN50)       | Biologend     | 310938     |
| Anti-human IL-2 Brilliant Violet 650 (MQ1-17H12)  | Biologend     | 500334     |
| Anti-human CD8 Brilliant Violet 650 (RPA-T8)      | Biologend     | 301042     |
| Anti-human CD233 Brilliant Violet 650 (11C3C65)   | Biologend     | 369316     |
| Anti-human CD107a Brilliant Violet 711 (H4A3)     | Biologend     | 328640     |
| Anti-human CD134 Brilliant Violet 711 (Ber-ACT35) | Biologend     | 350030     |
| Anti-human CD4 Brilliant Violet 785 (OKT4)        | Biologend     | 317442     |
| Anti-human Ki67 BUV395 (B56)                      | BD Bioscience | 564071     |
| Anti-human CD8 BUV496 (RPA-T8)                    | BD Bioscience | 612943     |
| Anti-human CD45RA BUV563 (HI100)                  | BD Bioscience | 612926     |
| Anti-mouse CD45 BUV661 (30-F11)                   | BD Bioscience | 612975     |
| Anti-human CD28 BUV737 (CD28.2)                   | BD Bioscience | 612815     |
| Anti-human CD3 BUV805 (SK7)                       | BD Bioscience | 612894     |
| Anti-human MCT4/ SLC16A3 (Polyclonal)             | Proteintech   | 22787-1-AP |
